# Supplementary material for: Nanoparticles of aromatic biopolymers catalyze CO2 cycloaddition to epoxides under atmospheric conditions
Source: Royal Society of Chemistry journal article supplement (doi:10.1039/d1se01305j), 2021-01-01
Supplement: d1se01305j1.pdf [file d1se01305j1.pdf]

## Electronic Supplementary Information

# Nanoparticles of Aromatic Biopolymers Catalyze CO<sub>2</sub> Cycloaddition to epoxides under Atmospheric Conditions

*Wimalin Jaroonwatana,<sup>1</sup> Tharinee Theerathanagorn,<sup>1</sup> Man Theerasilp,<sup>1</sup> Silvano Del Gobbo,<sup>1</sup>  
Dungporn Yiamsawas,<sup>2</sup> Valerio D'Elia,<sup>1\*</sup> and Daniel Crespy<sup>1\*</sup>*

<sup>1</sup> Department of Materials Science and Engineering, School of Molecular Science and  
Engineering, Vidyasirimedhi Institute of Science and Technology (VISTEC), Rayong 21210,  
Thailand

<sup>2</sup> National Nanotechnology Center (NANOTEC), National Science and Technology  
Development Agency (NSTDA), Pathumthani 12120, Thailand

## Determination of the conversion

The conversion of epoxides **1a-1f** was determined from  $^1\text{H}$  NMR spectroscopy measurements by comparing the integrals of  $\text{OCH}_2\text{CHR}$  protons in the starting material ( $H_a$ ) and in the product ( $H_b$ ) according to Equation S1 below and to the chemical shifts reported in Table S1.

**Equation S1.** Conversion as calculated from the intensities ( $I_H$ ) of the corresponding signals of  $\text{OCH}_2\text{CHR}$  protons in the starting material ( $H_a$ ), cyclic carbonate product ( $H_b$ ) and diol by-product ( $H_c$ ).

$$\text{Conversion} = \frac{I_{Hb} + I_{Hc}}{(I_{Ha} + I_{Hb} + I_{Hc})} \quad (\text{eq. S1})$$

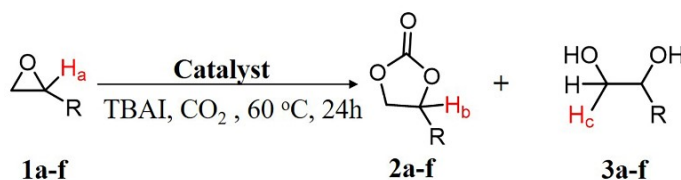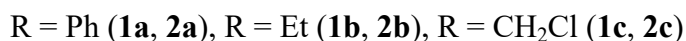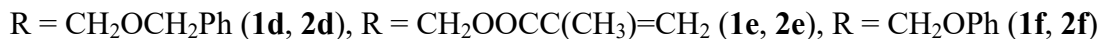

**Scheme S1.**  $\text{CO}_2$  conversion with epoxides into cyclic carbonates

**Table S1.** Chemical shifts ( $\delta$ , ppm,  $\text{CDCl}_3$ ) for the corresponding  $\text{OCH}_2\text{CHR}$  protons in the epoxides, cyclic carbonate products and diol by-product.

| Entry           | $\delta H_a$ (ppm) | $\delta H_b$ (ppm) | $\delta H_c$ (ppm) |
|-----------------|--------------------|--------------------|--------------------|
| <b>1a/2a</b>    | 3.86               | 5.68               | -                  |
| <b>1b/2b</b>    | 2.89               | 4.66               | -                  |
| <b>1c/2c/3c</b> | 3.24               | 4.94               | 3.62               |

|                 |      |      |      |
|-----------------|------|------|------|
| <b>1d/2d</b>    | 3.21 | 4.83 | -    |
| <b>1e/2e/3e</b> | 3.25 | 4.97 | 3.73 |
| <b>1f/2f/3f</b> | 3.35 | 5.02 | 3.84 |

### Determination of the selectivity

The selectivity for the carbonate product was determined via  $^1\text{H}$  NMR from the integrals of protons of carbonated product (**Hb**) and diol by-product (**Hc**) shown in **Scheme S1** according to **Equation S2**. The selectivity was calculated from the integral values(I) of the  $\text{RHCOCOOCH}_2$  protons in cyclic carbonate product (**Hb**) and  $\text{RHCOHCOHH}_2$  protons in diol by-product (**Hc**).

$$\text{Selectivity of cyclic carbonates (\%)} = \frac{I_{\text{Hb}}}{(I_{\text{Hb}} + I_{\text{Hc}})} \times 100 \quad (\text{eq. S2})$$

### Adsorption-desorption isotherms

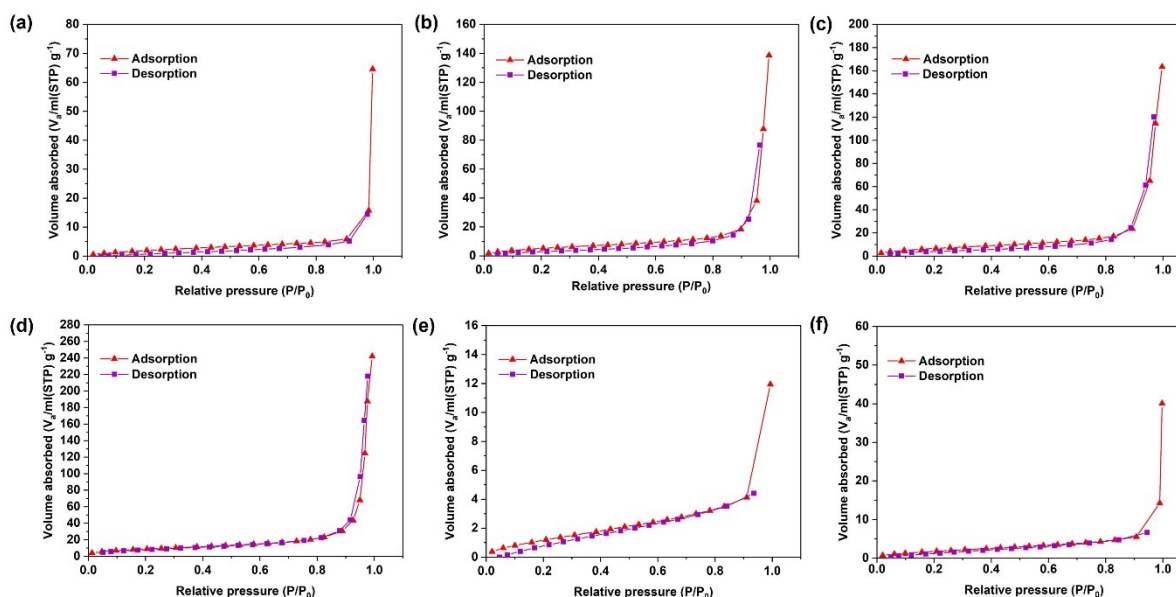

**Figure S1.** Nitrogen adsorption and desorption isotherm of (a) melanin microparticles from human hair, nanoparticles of (b) squid ink, (c) cuttlefish ink, (d) synthetic melanin, (e) lignin and (f) phenolated lignin.

## XPS measurements

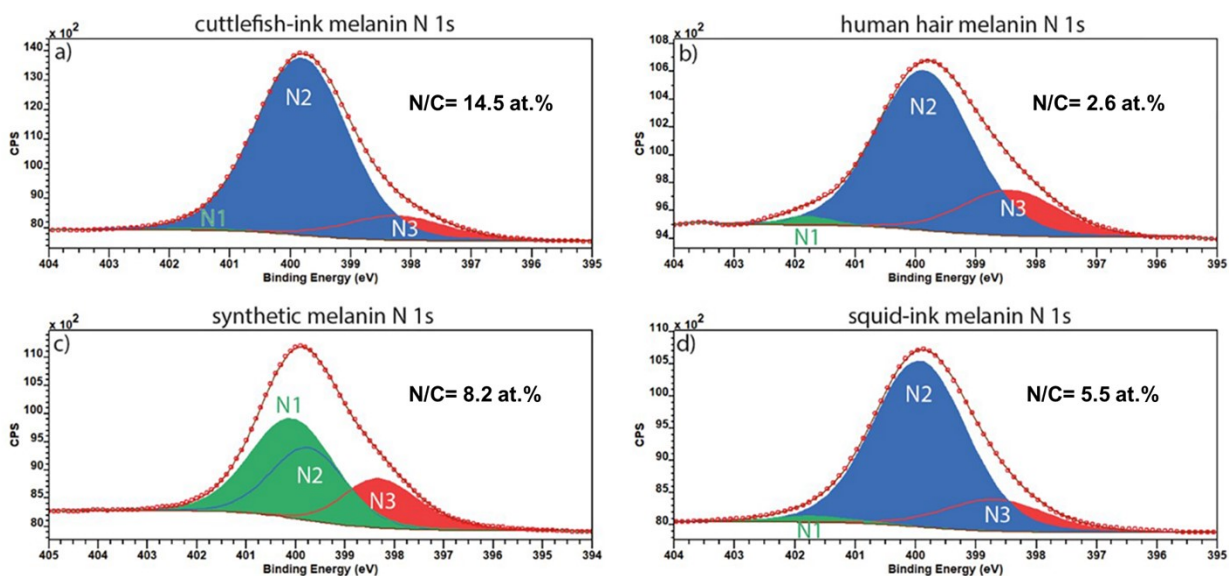

**Figure S2.** High resolution N 1s XPS spectra of a) cuttlefish ink melanin, b) human hair melanin, c) synthetic melanin, and d) squid ink melanin. The N/C atomic ratios estimated by XPS are given in each figure.

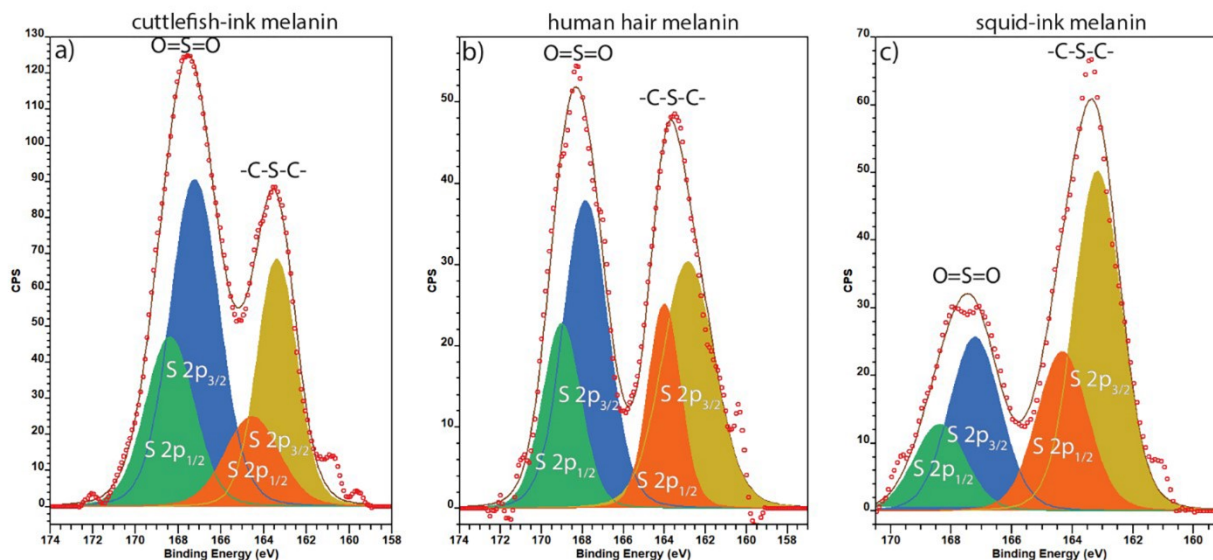

**Figure S3.** High resolution S 2p XPS spectra of a) cuttlefish-ink melanin, b) human hair melanin, and c) squid-ink melanin.

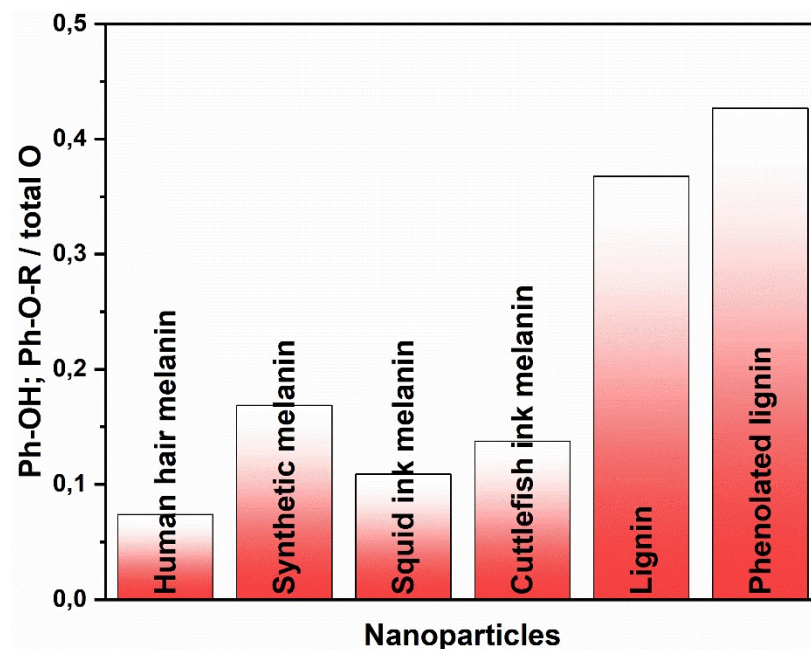

**Figure S4.** Ratio between phenolic oxygen atoms and total oxygen atoms based on deconvoluted O 1s components, as determined by XPS measurements.

**Table S2.** Binding energies of deconvoluted C 1s signals from melanin and lignin samples prepared in this work.

| Material                               | C 1s components (eV)        |               |             |             |                     |                             |                             |
|----------------------------------------|-----------------------------|---------------|-------------|-------------|---------------------|-----------------------------|-----------------------------|
|                                        | $\pi$ - $\pi^*$<br>shake-up | O-C=O<br>(C1) | C=O<br>(C2) | C-O<br>(C3) | C-N;<br>C-S<br>(C4) | C(sp <sup>3</sup> )<br>(C5) | C(sp <sup>2</sup> )<br>(C6) |
| Melanin microparticles from human hair | -                           | 289.01        | 287.92      | 286.61      | 285.92              | 285.12                      | 284.59                      |
| Synthetic melanin nanoparticles        | 290.52                      | 288.45        | 287.28      | 286.62      | 285.71              | 284.77                      | 284.18                      |
| Nanoparticles from squid ink           |                             | 288.05        | 287.05      | 286.45      | 285.85              | 285.30                      | 284.72                      |
| Nanoparticles from cuttlefish ink      | 289.83                      | 287.99        | 287.65      | 286.22      |                     | 285.00                      | 284.36                      |
| Lignin nanoparticles                   |                             | -             | -           | 286.37      |                     | 285.20                      | 284.65                      |

|                                 |        |        |        |  |        |        |
|---------------------------------|--------|--------|--------|--|--------|--------|
|                                 |        |        |        |  |        |        |
| Phenolated lignin nanoparticles | 288.86 | 287.01 | 286.20 |  | 285.35 | 284.48 |

**Table S3.** Binding energies of deconvoluted O 1s signals from melanin and lignin samples prepared in this work.

| Material                               | O 1s components (eV)                   |                    |                                         |                |              |
|----------------------------------------|----------------------------------------|--------------------|-----------------------------------------|----------------|--------------|
|                                        | Ph-OH<br>(aromatic)<br>(O1)            | -O-<br>C=O<br>(O2) | -C-OH<br>-C-O-C-<br>(aliphatic)<br>(O3) | -O-C=O<br>(O4) | -C=O<br>(O5) |
| Melanin microparticles from human hair | 533.31                                 | 532.60             |                                         | 532.00         | 531.40       |
| Synthetic melanin nanoparticles        | 533.35                                 | 532.54             |                                         | 531.82         | 531.19       |
| Nanoparticles from squid ink           | 533.40                                 | 532.67             |                                         | 532.00         | 531.35       |
| Nanoparticles from cuttlefish ink      | 533.29                                 | 532.60             |                                         | 531.79         | 531.08       |
|                                        | Ph-OH+<br>Ph-OR<br>(aromatic)<br>(O1*) |                    |                                         |                |              |
| Lignin nanoparticles                   | 532.96                                 |                    | 532.39                                  |                | 531.42       |
| Phenolated lignin nanoparticles        | 533.30                                 |                    | 532.42                                  |                | 531.46       |

**Table S4.** Binding energies of deconvoluted N 1s signals from melanin and lignin samples prepared in this work.

| Material                               | N 1s components (eV)                                      |                           |             |
|----------------------------------------|-----------------------------------------------------------|---------------------------|-------------|
|                                        | R-NH <sub>2</sub> /R-NH <sub>3</sub> <sup>+</sup><br>(N1) | R <sub>2</sub> NH<br>(N2) | =NR<br>(N3) |
| Melanin microparticles from human hair | 401.78                                                    | 399.88                    | 398.50      |
| Synthetic melanin nanoparticles        | 401.85                                                    | 399.91                    | 398.42      |
| Nanoparticles from squid ink           | 401.73                                                    | 399.93                    | 398.69      |

|                                   |        |        |        |
|-----------------------------------|--------|--------|--------|
| Nanoparticles from cuttlefish ink | 401.53 | 399.81 | 398.24 |
|-----------------------------------|--------|--------|--------|

**Table S5.** Binding energies of deconvoluted S 2p signals from melanin and lignin samples prepared in this work.

| Material                               | S 2p components (eV)                                 |                                                      |
|----------------------------------------|------------------------------------------------------|------------------------------------------------------|
|                                        | C-S-C (S1)                                           | SO <sub>2</sub> (S2)                                 |
| Melanin microparticles from human hair | 2p <sup>3/2</sup> 162.85<br>2p <sup>1/2</sup> 164.01 | 2p <sup>3/2</sup> 167.85<br>2p <sup>1/2</sup> 169.01 |
| Nanoparticles from squid ink           | 2p <sup>3/2</sup> 163.17<br>2p <sup>1/2</sup> 164.33 | 2p <sup>3/2</sup> 167.22<br>2p <sup>1/2</sup> 168.38 |
| Nanoparticles from cuttlefish ink      | 2p <sup>3/2</sup> 163.38<br>2p <sup>1/2</sup> 164.55 | 2p <sup>3/2</sup> 167.23<br>2p <sup>1/2</sup> 168.39 |

### Titration of phenolic groups of melanin nanoparticles

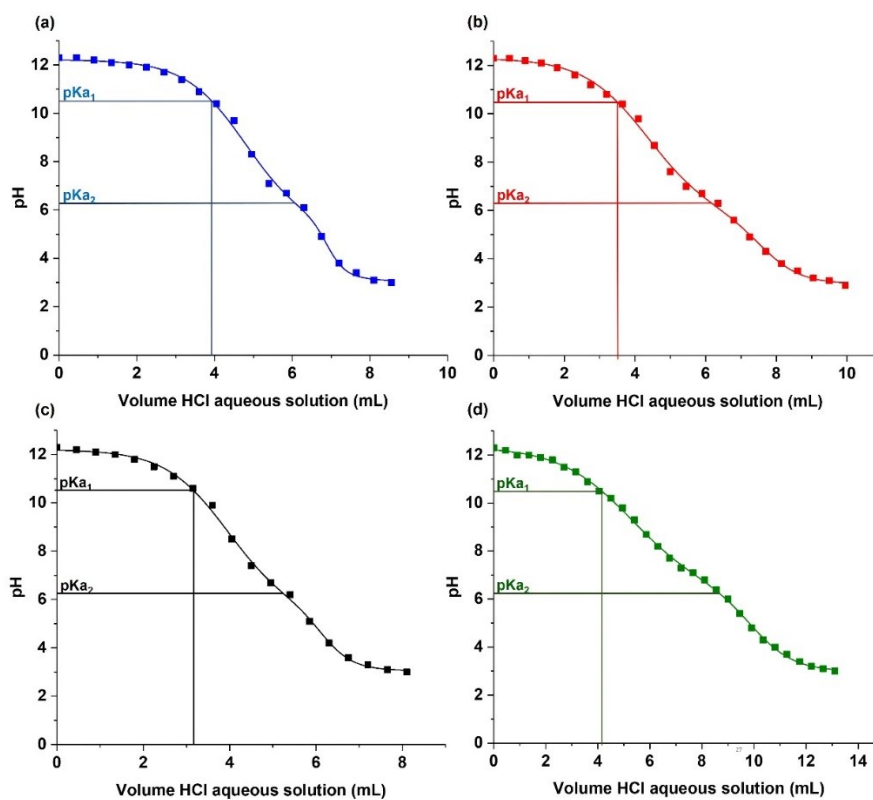

**Figure S5.** pH titration back-titration curves of the phenolic groups in melanin nanoparticles of (a) squid ink, (b) cuttlefish, (c) melanin microparticles from human hair, and (d) synthetic melanin nanoparticles.

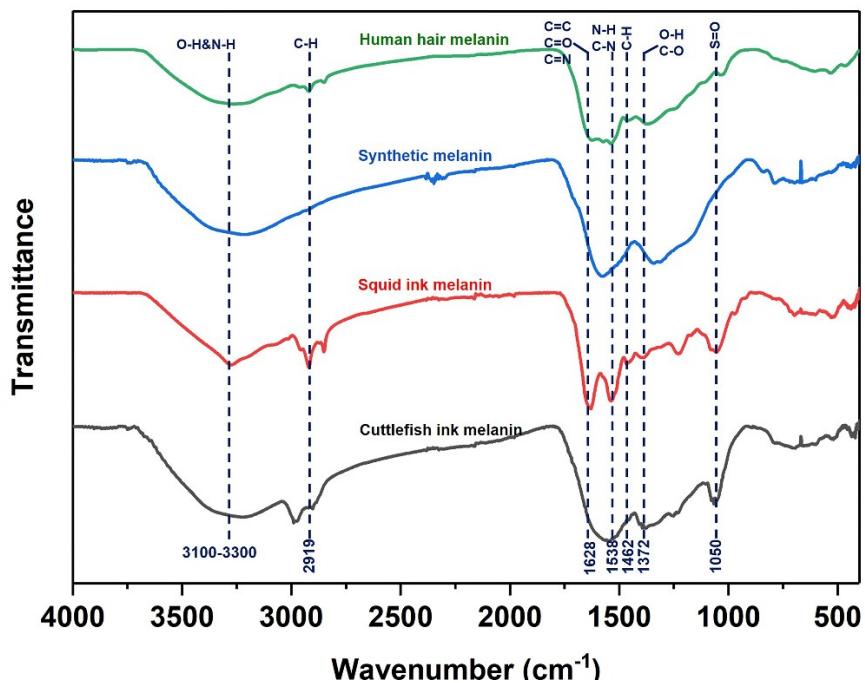

**Figure S6.** FTIR spectra of natural melanin particles from human hair, squid ink, cuttlefish ink, and synthetic melanin particles.



## <sup>1</sup>H NMR spectra of the products

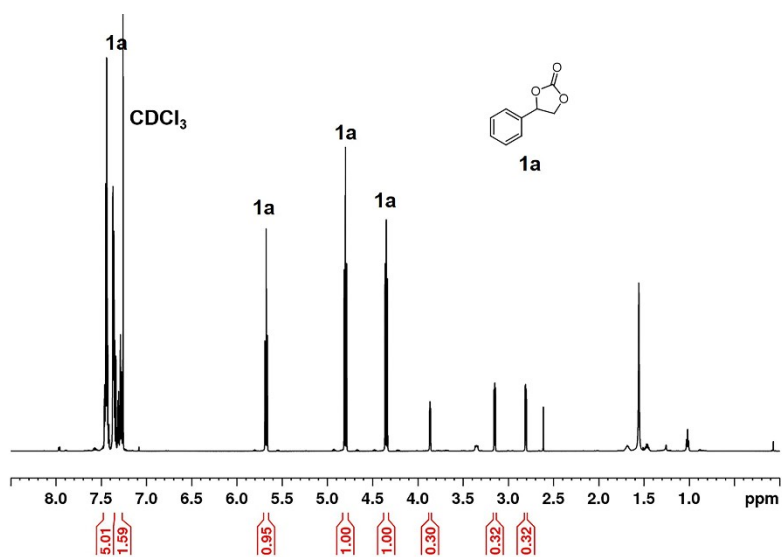

**Figure S7.** (4-phenyl-1,3-dioxolan-2-one) (1): <sup>1</sup>H NMR (CDCl<sub>3</sub>, 600 MHz): δ 7.47-7.35 (m, 5H), 5.70-5.65 (t, 1H, *J* = 8.0 Hz), 4.83 -4.77 (t, 1H, *J* = 8.4 Hz), and 4.37-4.32 ppm (dd, 1H, *J* = 8.7, 7.8 Hz).

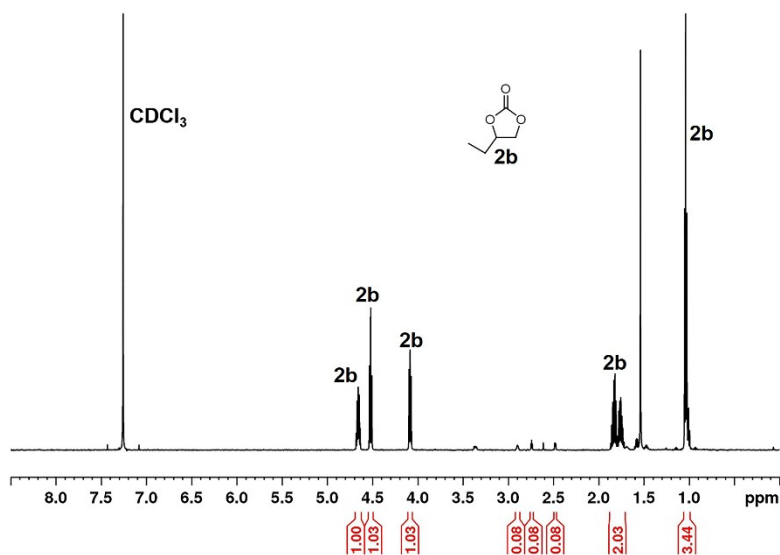

**Figure S8.** (4-ethyl-1,3-dioxolan-2-one) (2):  $^1\text{H}$  NMR ( $\text{CDCl}_3$ , 600 MHz):  $\delta$  4.62-4.55 (m, 1H), 4.48-4.42 (t, 1H,  $J = 8.1$  Hz), 4.04-3.99 (dd, 1H,  $J = 8.4, 7.0$  Hz), 1.82-1.75 (m, 2H), and 1.03-0.99 ppm (t, 3H,  $J = 7.5$  Hz).

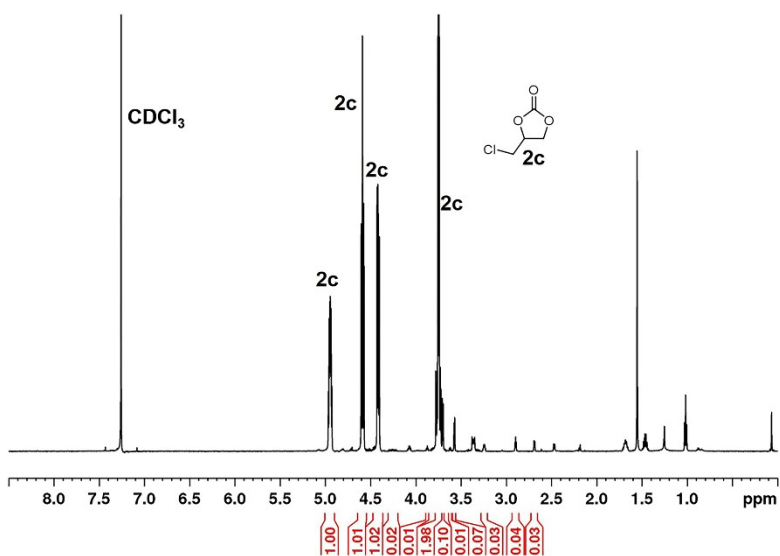

**Figure S9.** (4-(chloromethyl)-1,3-dioxolan-2-one) (3):  $^1\text{H}$  NMR ( $\text{CDCl}_3$ , 600 MHz):  $\delta$  5.00-4.90 (m, 1H), 4.64-4.54 (t, 1H,  $J = 8.5$  Hz), 4.47-4.36 (dd, 1H,  $J = 8.9, 5.7$  Hz), and 3.78-3.71 ppm (t, 2H,  $J = 4.7$  Hz).

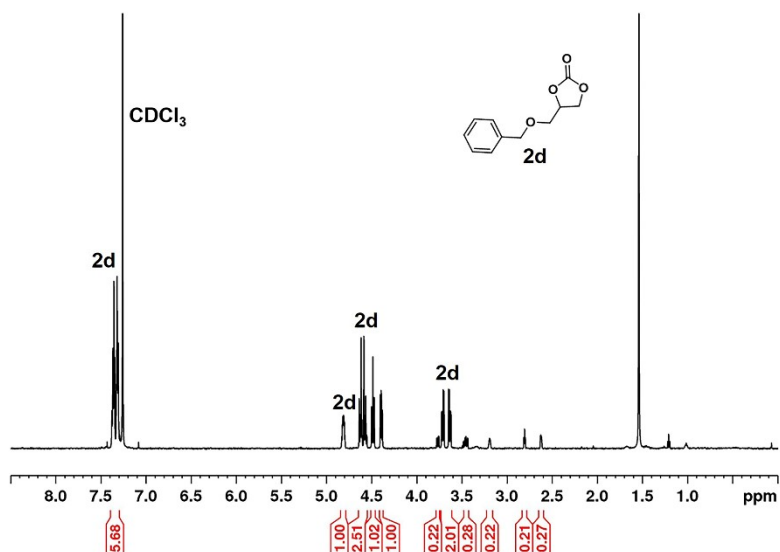

**Figure S10.** (4-(benzyloxymethyl)-1,3-dioxolan-2-one) (4):  $^1\text{H}$  NMR ( $\text{CDCl}_3$ , 600 MHz):  $\delta$  7.39-7.29 (m, 5H), 4.84-4.78 (dq, 1H,  $J$  = 9.0, 4.1 Hz), 4.64-4.54 (m, 2H), 4.51-4.46 (t, 1H,  $J$  = 8.3 Hz), 4.41-4.37 (dd, 1H,  $J$  = 8.3, 6.0 Hz), and 3.71 (dd, 1H,  $J$  = 10.9, 4.1 Hz) and 3.63 ppm (dd, 1H,  $J$  = 10.9, 3.8 Hz).

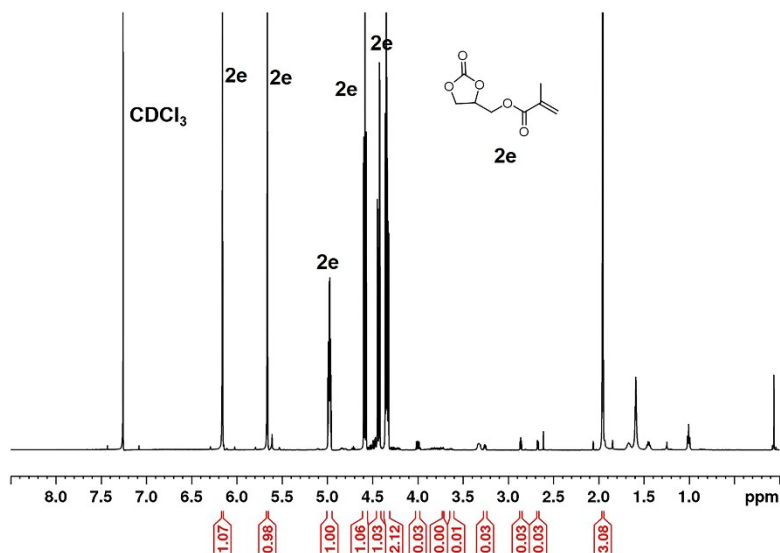

**Figure S11.** (2-oxo-1,3-dioxolan-4-yl)methyl methacrylate) (5):  $^1\text{H}$  NMR ( $\text{CDCl}_3$ , 600 MHz):  $\delta$  6.17-6.15 (q, 1H,  $J$  = 1.0 Hz), 5.67-5.65 (quint, 1H,  $J$  = 1.6 Hz), 5.00-4.95 (m, 1H), 4.60-4.56 (t, 1H,  $J$  = 8.6 Hz), 4.45-4.41 (dd, 1H,  $J$  = 12.6, 3.2 Hz), and 4.36-4.31 ppm (m, 2H).

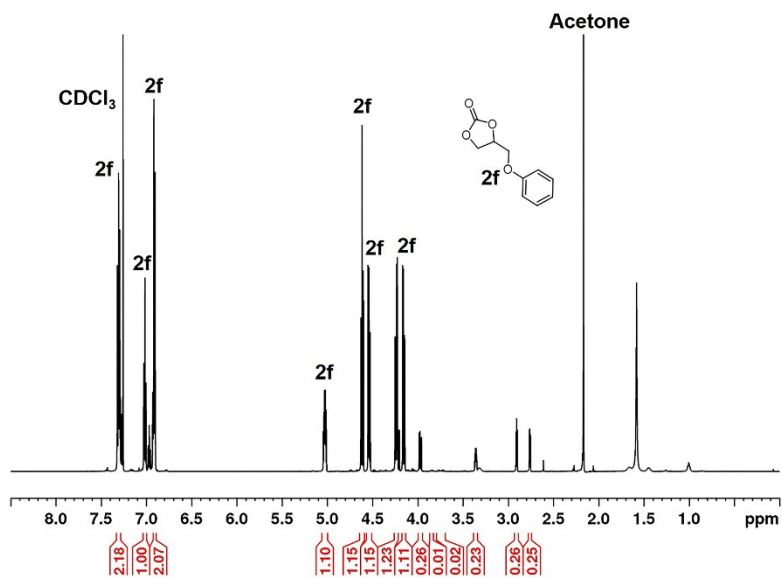

**Figure S12.** (4-(phoxymethyl)-1,3-dioxolan-2-one) (6):  $^1\text{H}$  NMR ( $\text{CDCl}_3$ , 600 MHz):  $\delta$  7.31 (m, 2H), 7.02 (tt, 1H,  $J = 7.4, 1.0$  Hz), 6.92-6.89 (m, 2H), 5.03 (m, 1H), 4.61 (t, 1H,  $J = 8.4$  Hz), 4.54 (dd, 1H,  $J = 8.6, 5.9$  Hz), 4.23 (dd, 1H, 10.5, 4.3 Hz), and 4.15 ppm (dd, 1H,  $J = 10.5, 3.6$  Hz).

**Table S6.** Comparison of catalytic performance of soluble model hydrogen bond donors in the cycloaddition of  $\text{CO}_2$  to styrene oxide under standard reaction conditions.

| Entry | Catalyst <sup>a</sup>                                                                                                          | Conversion <sup>b</sup><br>(%) | Selectivity <sup>b</sup> |
|-------|--------------------------------------------------------------------------------------------------------------------------------|--------------------------------|--------------------------|
| 1     | 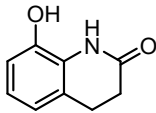<br>8-Hydroxy-3,4-dihydro-2(1H)-quinolinone | 46 ± 1                         | 100                      |
| 2     | <br>Phenol                                  | 58 ± 1                         | 100                      |

<sup>a</sup> Reaction conditions: styrene oxide (25 mmol, 2.83 mL), 0.1 mol % hydrogen bond donor, TBAI (1 mol%), 1 bar CO<sub>2</sub> (balloon), 60 °C, and 24 h.

<sup>b</sup> Conversion and selectivity measured by <sup>1</sup>H NMR spectroscopy.

### Recycling of the catalyst

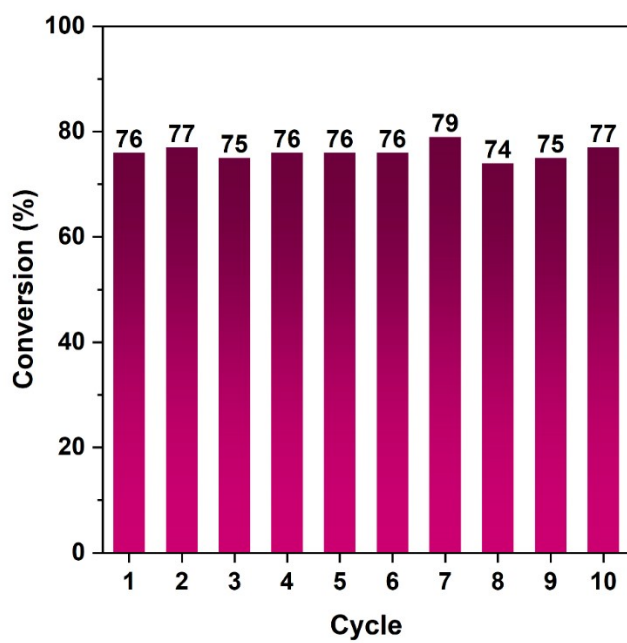

**Figure S13.** Reusability of phenolated lignin nanoparticles for the synthesis of styrene carbonate from CO<sub>2</sub> and styrene oxide. Reaction condition: styrene oxide (8.82 mmol), 35 mg phenolated lignin nanoparticles, TBAI (1 mol% compared with styrene oxide), 1 bar CO<sub>2</sub> (balloon), 60 °C, and 24 h.

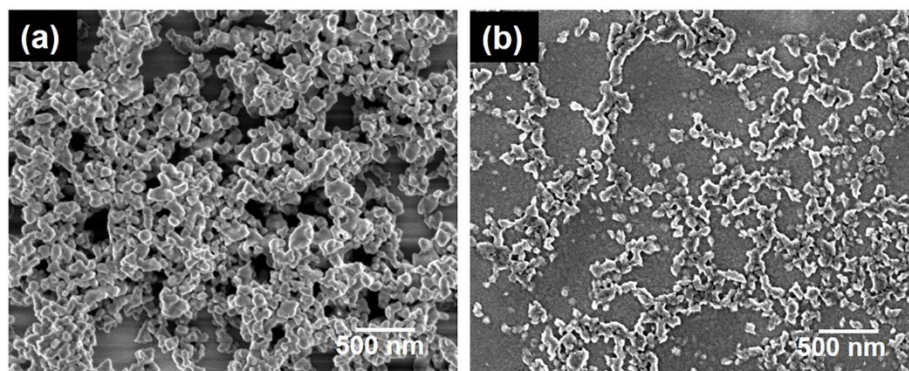

**Figure S14.** SEM micrographs of phenolated lignin nanoparticles after the first cycle (a) and the tenth cycle of catalysis (b).
